# Supplementary material for: Nuclear Binding Protein 2/Nesfatin-1 Affects Trophoblast Cell Fusion during Placental Development via the EGFR-PLCG1-CAMK4 Pathway
Source: MDPI journal article supplement (doi:10.3390/ijms25031925), 2024-02-05
Supplement: s1 [file s1]

# Nuclear Binding Protein 2/Nesfatin-1 Affects Trophoblast Cell Fusion during Placental Development via the EGFR-PLCG1-CAMK4 Pathway

Qinyu Dang <sup>1</sup>, Yandi Zhu <sup>1</sup>, Yadi Zhang <sup>1</sup>, Zhuo Hu <sup>1</sup>, Yuchen Wei <sup>1</sup>, Zhaoyang Chen <sup>1</sup>, Xinyin Jiang <sup>2</sup>, Xiaxia Cai <sup>1</sup> and Huanling Yu <sup>2,\*</sup>

<sup>1</sup> Department of Nutrition and Food Hygiene, School of Public Health, Capital Medical University, Beijing 100069, China; dang\_qinyu@mail.ccmu.edu.cn (Q.D.); zhuyandi@ccmu.edu.cn (Y.Z.); yadizhang@mail.ccmu.edu.cn (Y.Z.); huzhuo99@mail.ccmu.edu.cn (Z.H.); weiyuchen\_98@mail.ccmu.edu.cn (Y.W.); chenzhaoyang@mail.ccmu.edu.cn (Z.C.); caixx1988@ccmu.edu.cn (X.C.)

<sup>2</sup> Departments of Health and Nutrition Sciences, Brooklyn College of City University of New York, New York, NY 11210, USA; xinyinjiang@brooklyn.cuny.edu

\* Correspondence: yuhlzjl@ccmu.edu.cn; Fax: +86-10-83911652

Supplementary documents

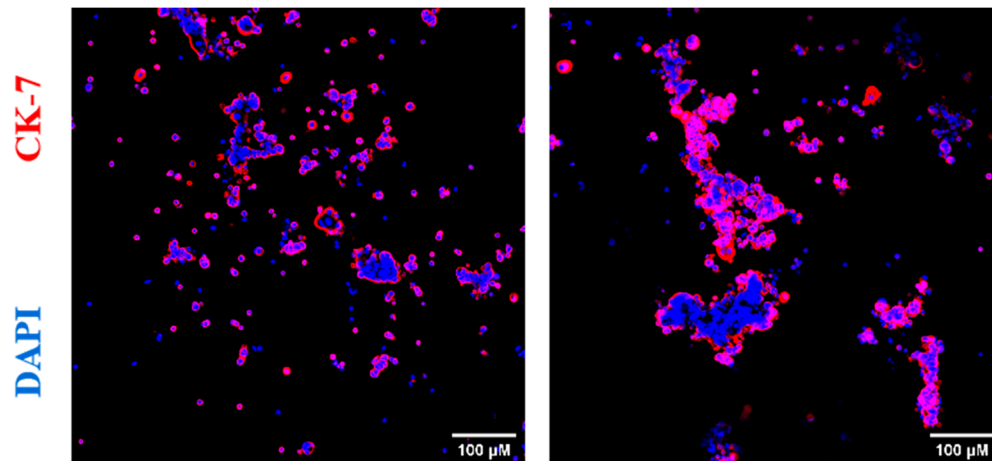

Figure S1, Identification of primary primary trophoblast cells. Immunofluorescence of cytokeratin-7 (CK-7) was used to identify isolated cell populations at the 24-hour time point. Cells were stained with anti-keratin-7 (red) or DAPI (blue). Scale bars represent 100  $\mu\text{m}$ .

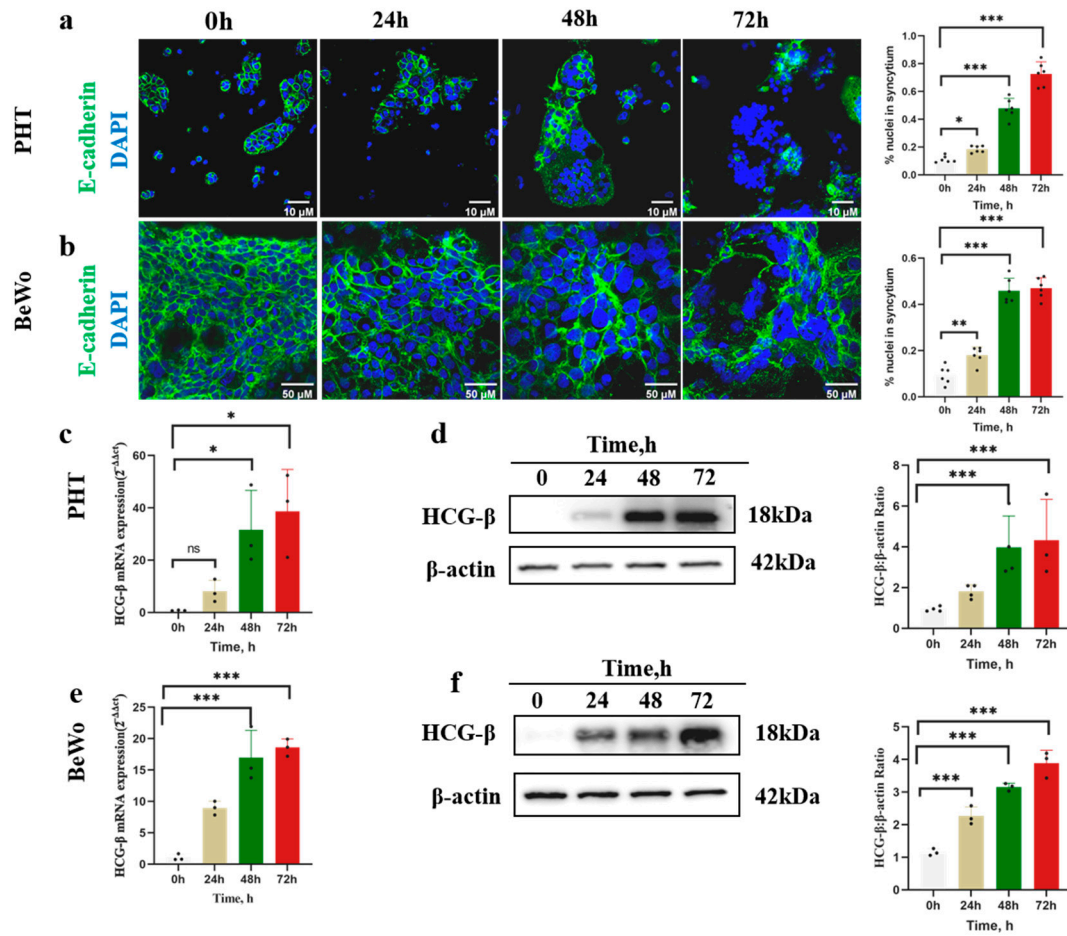

Figure S2, Increase in the degree of differentiation and fusion during trophoblast syncytialization. (a) Representative immunofluorescence images depict changes in E-cadherin at different time points of primary trophoblast syncytialization. The scale lines are 20 μm and 50 μm, respectively. (b) Representative immunofluorescence images depict changes in E-cadherin at different time points of Forskolin-induced differentiation and fusion of BeWo cells. Cells were stained with anti-E-cadherin (green) or DAPI (blue). (c) mRNA levels of HCG-β at different time points in primary trophoblast syncytia; (d) Protein expression levels of HCG-β relative to β-actin at different time points in trophoblast syncytia. (e) HCG-β at different time points in Forskolin-induced differentiation and fusion of BeWo cells. mRNA levels; (f) Protein expression levels of HCG-β relative to β-actin at different time points of Forskolin-induced differentiation and fusion of BeWo cells. Data are expressed as mean  $\pm$  SD and analyzed by one-way ANOVA and Tukey-Kramer multiple comparison test. (\* $p < 0.05$ ; \*\* $p < 0.001$ ; \*\*\* $p < 0.001$ ).

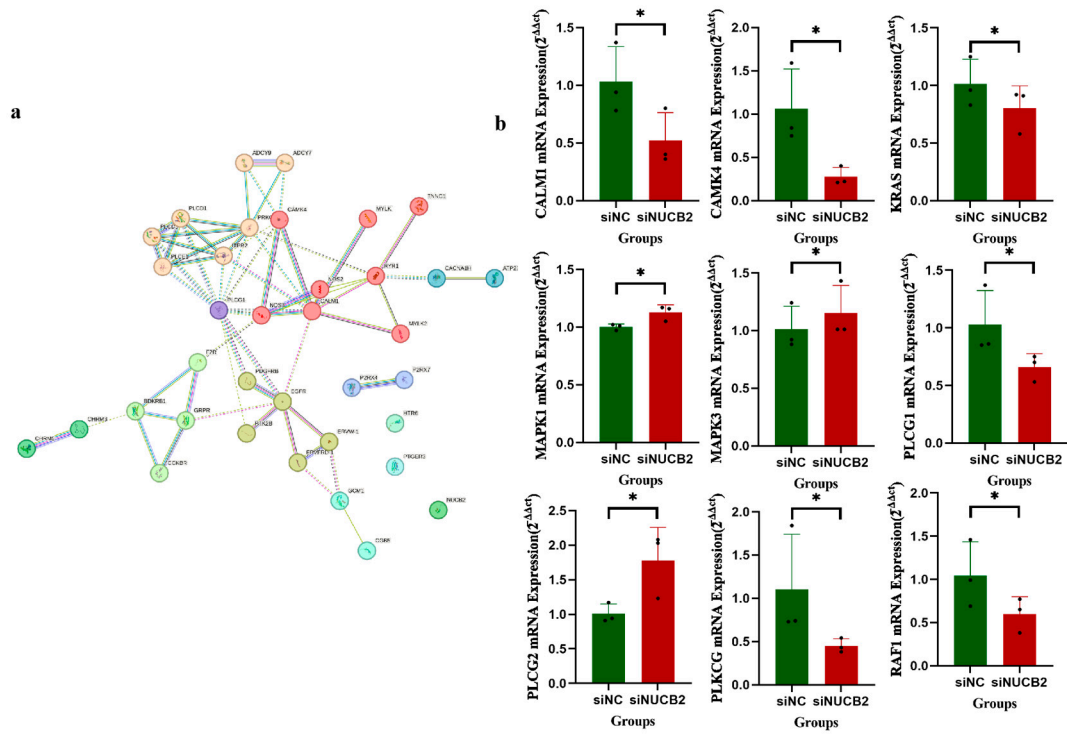

Figure S3. Genes involved in the calcium signaling pathway. **(a)** string database for protein interactions between calcium signaling pathway genes and trophectoderm differentiation fusion-related genes. **(b)** Expression of genes associated with EGFR gene expression in the calcium signaling pathway. Data are expressed as mean  $\pm$  SD and analyzed by one-way ANOVA and Tukey-Kramer multiple comparison test. (\* $p < 0.05$ ).

Table S1. Sequence of the primers for real-time PCR used in this study.

|                       | Forward Primer            | Reverse Primer           |
|-----------------------|---------------------------|--------------------------|
| GAPDH(human)          | GAGTCAACGGATTTGGTCGT      | TTGATTTTGGAGGGATCTCG     |
| $\beta$ -actin(human) | AAAGCCACCCCACTTCTCTC      | GCAATGCTATCACCTCCCCT     |
| NUCB2(human)          | GAGCCACACATTTAAAGTCTGAAGT | GCAGAGAAAAAGGAAGGGAGC    |
| ERVW-1(human<br>)     | GCAACTGCTATCACTCTGCCACTC  | AGACAGTGACTCCAAGTCCTCCAG |
| ERVFRD(human<br>)     | AGCAGCCGTAGTCCTTCAA       | AGGGGAAGAACCCAAGAGAA     |
| GCM1(human)           | GTCACCAACTTCTGGAGGCAC     | GCTCTTCTTGCCTCAGCTTCTAA  |
| $\beta$ -HCG(human)   | GCTTCAGTCCAGCACCTTTC      | CACGGTGAAGTGACCTCAGA     |
| $\beta$ -actin(rat)   | TGATGACATCAAGAAGGTGGTGAAG | TCCTTGAGGCCATGTGGGCCAT   |
| E-cadherin(rat)       | CCTACAATGCTGCCATCGCCTAC   | GGGTAACCTCTCTCGGTCCAGTCC |
| NUCB2(rat)            | CATGAAGACCACCCCAAAGT      | TTCATCCAGGAATCCATCGT     |
| EGFR(human)           | GGTGAGTGGCTTGTCTGGAA      | CCTTACGCCCTTCACTGTGT     |
| PLCG1(human)          | GGAAGACCTCACGGGACTTTG     | GCGTTTTTCAGGCGAAATTCCA   |
| PLCG2(human)          | CAGTCAAGGTTCTCGGTGCT      | GCAGAAATGCCAGGTTTGGG     |
| PRKCG(human)          | CCTACGTGAACCCCGACTTC      | CGTTGGGGACACCTAGTGG      |
| KRAS(human)           | AGGCCCTGTGTGAACCTTTG      | CAAACCTGCCCTAGTCCCTCC    |
| RAF1(human)           | AGATGCCGTGTTTGATGGCT      | ACTGCACAGCACTCTGGTTG     |
| MAPK1(human)          | ACCAGACCTACTGCCAGAGAACC   | TGGTCATTGCTGAGGTGTTGTGTC |
| MAPK3(human)          | CATTGTGCAGGACCTGATGGAGAC  | GTTGGCGGAGTGGATGTACTTGAG |
| CAMK4(human)          | AGCCTCGTCCCGGATTACT       | TAAGGCTTCTGGGTCCCCTT     |

**Table S2. Antibodies used in this study.**

| Antibody       | Host species | Catalogue number | Manufacturer | Final concentration |
|----------------|--------------|------------------|--------------|---------------------|
| GAPDH          | Mouse        | G0100-100UL      | LABLEAD      | 1: 5000             |
| $\beta$ -HCG   | Rabbit       | ab53087          | Abcam        | 1: 500              |
| GCM1           | Mouse        | ab236388         | Abcam        | 1: 2000             |
| ERVW-1         | Rabbit       | ab179693         | Abcam        | 1: 500              |
| Cytokeratin 7  | Rabbit       | ab181598         | Abcam        | 1: 100              |
| E-Cadherin     | Mouse        | #14472           | CST          | 1: 50               |
| NUCB2          | Rabbit       | ab229683         | Abcam        | 1:500               |
| $\beta$ -actin | Rabbit       | #4970            | CST          | 1:5000              |
| HERV-FRD       | Rabbit       | ab230235         | Abcam        | 1:1000              |
| EGFR           | Rabbit       | ab52894          | Abcam        | 1:5000              |
| P-EGFR         | Rabbit       | ab40815          | Abcam        | 1:2500              |
| PLCG1          | Mouse        | ab302940         | Abcam        | 1:1000              |
| P-PLCG1        | Rabbit       | ab76031          | Abcam        | 1:100000            |
| CAMK4          | Rabbit       | YT0627           | immunoway    | 1:1000              |
| P-CAMK4        | Rabbit       | YP0043           | immunoway    | 1:1000              |

CST: Cell signaling technology, Danvers, MA, USA. Abcam: Abcam, Cambridge, UK. USA.

Immunoway: immunoway Biotech, China.
